# Supplementary material for: Long-Term Breast Morphological Analysis after Ergonomic FALD Flap Reconstruction
Source: Preprints.org preprint supplement (doi:10.20944/preprints202408.1627.v1), 2024-08-22
Supplement: Supplementary file 1 [file supplementary]

**Table 1.** Subscale analysis of breast reconstruction

| Subscale | **Category 0** | **Category 1** | **Category 2** |
| --- | --- | --- | --- |
| **Volume of breast mound** | Marked discrepancy relative to contralateral side | Mild discrepancy relative to contralateral side | Symmetrical volume |
| **Shape of breast mound** | Marked shape deformity | Mild shape deformity | Natural or symmetrical shape |
| **Placement of breast mound** | Marked displacement | Mild displacement | Symmetrical and aesthetic placement |
| **IMF** | Poorly defined/not identified | Defined but with asymmetry or lack of medial definition | Defined and symmetrical |
| **Skin texture** | Marked discrepancy relative to contralateral side | Mild discrepancy relative to contralateral side | Natural texture |
| **Scar location** | More noticeable | Less noticeable | Well hidden |
